# Supplementary material
Source: HighWire-hosted journal article supplement (https://erj.ersjournals.com/content/56/6/2003820)
Supplement: inline-supplementary-material-1 [file inline-supplementary-material-1.pdf]

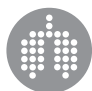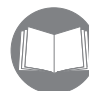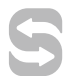

SHAREABLE PDF

# A golden age of asthma research

Paul M. O'Byrne <sup>1</sup> and Ian D. Pavord<sup>2</sup>

**Affiliations:** <sup>1</sup>Firestone Institute for Respiratory Health and the Dept of Medicine, McMaster University, Hamilton, ON, Canada. <sup>2</sup>Respiratory Medicine Unit and Oxford Respiratory NIHR BRC, Nuffield Dept of Medicine, University of Oxford, Oxford, UK.

**Correspondence:** Paul O'Byrne, McMaster University, HSC 2E3, 1280 Main St West, Hamilton, ON L8S 4K1, Canada. E-mail: obyrne@mcmaster.ca

 @ERSpublications

**There has been an extraordinary increase in the understanding of asthma pathogenesis and treatment over the past decade. The *ERJ* is launching a series of reviews to highlight these advances in asthma and identify areas that still require investigation.** <https://bit.ly/2HrPfpO>

**Cite this article as:** O'Byrne PM, Pavord ID. A golden age of asthma research. *Eur Respir J* 2020; 56: 2003820 [<https://doi.org/10.1183/13993003.03820-2020>].

This single-page version can be shared freely online.

More than a decade ago, there was a widely held opinion among respiratory clinicians and researchers that asthma was, for the most part, solved and not worth investing intellectual or financial capital into research. There was certainly a small proportion of the asthma population (<10%) with severe refractory asthma, who merited attention [1]; but the vast majority of asthmatic patients were well served with the available treatment armamentarium of rapid onset bronchodilators (mainly short-acting inhaled  $\beta_2$ -agonists (SABAs)), inhaled corticosteroids (ICS), or ICS and long-acting inhaled  $\beta_2$ -agonist (LABA) combinations delivered from a single inhaler.
